# Supplementary material for: Effect of improved cookstove intervention on childhood acute lower respiratory infection in Northwest Ethiopia: a cluster-randomized controlled trial
Source: PubMed Central journal article supplement (PMC7780395; doi:10.1186/s12887-020-02459-1), 2021-01-04
Supplement: 12887_2020_2459_MOESM1_ESM.pdf [file 12887_2020_2459_MOESM1_ESM.pdf]

| Characteristics               |                         | Treatment arm |                  |               | $X^2$ (P-value) |
|-------------------------------|-------------------------|---------------|------------------|---------------|-----------------|
|                               |                         | Control (%)   | Intervention (%) | Total (%)     |                 |
| Lost to follow-up             | Yes                     | 1,092 (9.9)   | 1,148 (10.4)     | 2,240 (10.2)  | 1.65<br>(0.199) |
|                               | No                      | 9,932 (90.1)  | 9,860 (89.6)     | 19,792 (89.8) |                 |
|                               | Total                   | 11,024 (100)  | 11,008 (100)     | 22,032 (100)  |                 |
| Reasons for lost to follow-up | Moved out of study area | 558 (51.1)    | 549 (47.8)       | 1,107 (49.4)  | 3.94<br>(0.268) |
|                               | Consent withdrawal      | 318 (29.1)    | 377 (32.8)       | 695 (31.0)    |                 |
|                               | Death of child          | 148 (13.6)    | 148 (12.9)       | 296 (13.2)    |                 |
|                               | Not at home             | 68 (6.2)      | 74 (6.5)         | 142 (6.4)     |                 |
|                               | Total                   | 1,092 (100)   | 1,148 (100)      | 2,240 (100)   |                 |
